# Supplementary material
Source: publisher site journal article supplement (https://www.dovepress.com/get_supplementary_file.php?f=278162.docx)
Supplement: Supplementary file 1 [file get_supplementary_file.php]

| HAZARD IDENTIFICATION SHEET | | | | | | | | | |
| --- | --- | --- | --- | --- | --- | --- | --- | --- | --- |
| Assessment completed by: | | Date: | | | | | | | |
| Location: | | Ref #: | | | | | | | |
| Description of Task/ Guidelines referenced | | | | | | | | | |
| Experiment  laboratory  Equipment and Machines  | | | | | | | | | |
| Hazard Identification – Material Hazard(s) tick if applicable | | | | | | | | | |
| Risk factor | Hazard Description | | Risk (Harm) | Biohazard | Chemical | Radiation | Physical | Electrical | Ergonomic |
|  |  | |  |  |  |  |  |  |  |
|  |  | |  |  |  |  |  |  |  |
|  |  | |  |  |  |  |  |  |  |
|  |  | |  |  |  |  |  |  |  |
|  |  | |  |  |  |  |  |  |  |
|  |  | |  |  |  |  |  |  |  |
|

| HAZARD EVALUATION SHEET | | | | | | | | | | | |
| --- | --- | --- | --- | --- | --- | --- | --- | --- | --- | --- | --- |
| Assessment completed by: | | | | | Date: | | | | | | |
| Location: | | | | | Ref #: | | | | | | |
| Description of Task/ Guidelines referenced | | | | | | | | | | | |
| Experiment  laboratory  Equipment and Machines  | | | | | | | | | | | |
| Hazard Evaluation | | | | | | | | | | | |
| Hazard Description | Controls adapted for Risk minimization | Risk evaluation | | | | Risk  Rating (Low, Medium, High) | Control recommended for risk minimization | Risk evaluation | | | Risk  Rating (Low, Medium, High) |
| Likelihood of occurrence (grade 1-5) (A) | Hazard (Severity) (grade 1-5) (B) | Risk  (likelihood x hazard) (A x B) | |
| Likelihood of occurrence (grade 1-5) (A) | Hazard (Severity) (grade 1-5)  (B) | Risk  (likelihood x hazard) (A x B) |
|  |  |  |  |  | |  |  |  |  |  |  |
|  |  |  |  |  | |  |  |  |  |  |  |
|  |  |  |  |  | |  |  |  |  |  |  |
|  |  |  |  |  | |  |  |  |  |  |  |
|  |  |  |  |  | |  |  |  |  |  |  |
|  |  |  |  |  | |  |  |  |  |  |  |
|  |  |  |  |  | |  |  |  |  |  |  |
|  |  |  |  |  | |  |  |  |  |  |  |
|  |  |  |  |  | |  |  |  |  |  |  |
|  |  |  |  |  | |  |  |  |  |  |  |
|  |  |  |  |  | |  |  |  |  |  |  |
|  |  |  |  |  | |  |  |  |  |  |  |
|  |  |  |  |  | |  |  |  |  |  |  |
|  |  |  |  |  | |  |  |  |  |  |  |
|  |  |  |  |  | |  |  |  |  |  |  |
|  |  |  |  |  | |  |  |  |  |  |  |
|  |  |  |  |  | |  |  |  |  |  |  |
|  |  |  |  |  | |  |  |  |  |  |  |
|  |  |  |  |  | |  |  |  |  |  |  |
|  |  |  |  |  | |  |  |  |  |  |  |

| **Biosafety level 2 checklist for Microbiology laboratory** | | |
| --- | --- | --- |
| **Statement** | **Yes** | **No** |
| “Access to the laboratory is limited or restricted at the discretion of the Principal Investigator or laboratory supervisor when experiments are in progress.” |  |  |
| Appropriate signs to not Eat, drink, smoking are posted in the door |  |  |
| “Required procedures for entering the laboratory are posted at the entrance to the laboratory when infectious agents are present.” |  |  |
| “Required procedures for exiting the laboratory are posted at the entrance to the laboratory when infectious agents are present.” |  |  |
| Appropriate disinfectant is available to disinfect Spills and splashed |  |  |
| Laboratory Wastes are placed in durable, leaf-proof containers |  |  |
| The hazardous waste collection area is clearly identified and marked by signs |  |  |
| “A biohazard sign is posted at the entrance to the laboratory.” |  |  |
| Biosafety level sign is posted at the entrance to the laboratory |  |  |
| “Laboratory personnel receive appropriate training regarding their duties, the necessary precautions to prevent exposure” |  |  |
| Material safety data sheet is updated |  |  |
| “All the persons entering the lab are advised about the potential hazards.” |  |  |
| All the personal working in the lab received immunization or prophylactic interventions for HBV |  |  |
| Laboratory safety manual is available and accessible |  |  |
| Small volumes of hazards chemicals are stored in the lab |  |  |
| “All laboratory personally especially pregnant women are providing information regarding immune competence and conditions that may predispose them to infection.” |  |  |
| Contact information of the TA in-charge of the lab is posted in the laboratory door |  |  |
| Chemicals are stored properly in chemical cabinet or flammable chemicals cabinet |  |  |
| Properly maintained Laboratory equipment’s and machines are used |  |  |
| Chemicals are routinely inspected |  |  |
| First aid cabinet is available |  |  |
| First aid cabinet is contain required equipment’s |  |  |
| First aid is regularly inspected |  |  |
| “Biosafety cabinet level, preferably class II, is available whenever procedures with a potential for creating aerosols or splashes” |  |  |
| “A personal protective equipment (PPE) e.g. Gloves , face mask, goggles have direction signs posted inside the laboratory” |  |  |
| “Protective clothing is disposed appropriately, or laundered by the institution ( lab coats are not taken home) “ |  |  |
| Eye protection e.g. Goggles is available for anticipated splashed or spraying infectious or hazardous material |  |  |
| Face protection e.g. Face shield is available for anticipated splashed or spraying infectious or hazardous material |  |  |
| “Laboratory doors are self-closing and have lock” |  |  |
| “The laboratory has sink for hand washing . The sink may be manually , hands-free or automatically operated.” |  |  |
| The laboratory is designed in a way, so it is easy to clean |  |  |
| The lab has good house keeping |  |  |
| The lab furniture are clean and in good condition |  |  |
| The ceiling is properly fixed and secured |  |  |
| The floor is clean and free of slipping hazard |  |  |
| The drainage system is functioning properly |  |  |
| The maintenance records for lab equipment’s/ tools is available |  |  |
| Laboratory cabinet and drawers is capable of supporting anticipated use |  |  |
| “Bench top are impervious to water and resistant to heat , organic solvent, acid , alkalis, and other chemicals” |  |  |
| “Appropriate chairs are used in the laboratory work “ |  |  |
| “An eyewash station is readily available” |  |  |
| An safety shower station is readily available |  |  |
| Biological spill kit procedure is available in the lab |  |  |
| Chemical spill kit procedure is available in the lab |  |  |
| The exit pathway is free from obstruction |  |  |
| The fire emergency procedure is displayed clearly |  |  |
| The emergency exit door is working properly |  |  |
| The fire extinguisher is accessible |  |  |
| The fire extinguisher is inspected monthly |  |  |
| The fire alarm equipment is working |  |  |
| The fire alarm equipment is inspected |  |  |
| The fire suppression system is provided and inspected |  |  |
| All the electronic wiring/ sockets/ extension cords/ adaptors is safe & not overloaded. |  |  |
| The operating instructions for machines and equipment’s e.g. Autoclave are available and displayed in the lab |  |  |
| The lab lights are adequate |  |  |
| The lab lights are working properly |  |  |
| The chemical inventory is available |  |  |
| Material safety data sheet (MSDS) is available and accessible |  |  |
| Material safety data sheet (MSDS) is updated |  |  |
| Laboratory has adequate supervision ( 1supervisor : 15 students) |  |  |
| Chemical spill kit is quarterly inspected |  |  |
| The gas cylinders secured and located away from electric connection, flammable or combustible , and corrosive material |  |  |
| The gas cylinders are labelled with name of the gas type |  |  |
| The full gas cylinders are segregated from the empty cylinders |  |  |
| The gas cylinders is free from any signs of leak or damage |  |  |

| **Biosafety level 2 checklist for Hematology laboratory** | | |
| --- | --- | --- |
| **Statement** | **Yes** | **No** |
| “Access to the laboratory is limited or restricted at the discretion of the Principal Investigator or laboratory supervisor when experiments are in progress.” |  |  |
| Appropriate signs to not Eat, drink, smoking are posted in the door |  |  |
| “Required procedures for entering the laboratory are posted at the entrance to the laboratory when infectious agents are present” |  |  |
| “Required procedures for exiting the laboratory are posted at the entrance to the laboratory when infectious agents are present” |  |  |
| Appropriate disinfectant is available to disinfect Spills and splashed |  |  |
| Laboratory Wastes are placed in durable, leaf-proof containers |  |  |
| The hazardous waste collection area is clearly identified and marked by signs |  |  |
| “A biohazard sign is posted at the entrance to the laboratory” |  |  |
| Biosafety level sign is posted at the entrance to the laboratory |  |  |
| “Laboratory personnel receive appropriate training regarding their duties, the necessary precautions to prevent exposure” |  |  |
| Material safety data sheet is updated |  |  |
| “All the persons entering the lab are advised about the potential hazards” |  |  |
| All the personal working in the lab received immunization or prophylactic interventions for HBV |  |  |
| Laboratory safety manual is available and accessible |  |  |
| Small volumes of hazards chemicals are stored in the lab |  |  |
| “All laboratory personally especially pregnant women are providing information regarding immune competence and conditions that may predispose them to infection” |  |  |
| Contact information of the TA in-charge of the lab is posted in the laboratory door |  |  |
| Chemicals are stored properly in chemical cabinet or flammable chemicals cabinet |  |  |
| Properly maintained Laboratory equipment’s and machines are used |  |  |
| Chemicals are routinely inspected |  |  |
| First aid cabinet is available |  |  |
| First aid cabinet is contain required equipment’s |  |  |
| First aid is regularly inspected |  |  |
| Fume hood is available whenever procedures with a potential for creating aerosols or splashes |  |  |
| “A personal protective equipment (PPE) e.g. Gloves , face mask, goggles have direction signs posted inside the laboratory” |  |  |
| “Protective clothing is disposed appropriately, or laundered by the institution ( lab coats are not taken home) “ |  |  |
| Eye protection e.g. Goggles is available for anticipated splashed or spraying infectious or hazardous material |  |  |
| Face protection e.g. Face shield is available for anticipated splashed or spraying infectious or hazardous material |  |  |
| “Laboratory doors are self-closing and have lock” |  |  |
| “The laboratory has sink for hand washing . The sink may be manually , hands-free or automatically operated.” |  |  |
| The laboratory is designed in a way, so it is easy to clean |  |  |
| The lab has good house keeping |  |  |
| The lab furniture are clean and in good condition |  |  |
| The ceiling is properly fixed and secured |  |  |
| The floor is clean and free of slipping hazard |  |  |
| The drainage system is functioning properly |  |  |
| The maintenance records for lab equipment’s/ tools is available |  |  |
| Laboratory cabinet and drawers is capable of supporting anticipated use |  |  |
| “Bench top are impervious to water and resistant to heat , organic solvent, acid , alkalis, and other chemicals” |  |  |
| “Appropriate chairs are used in the laboratory work “ |  |  |
| “An eyewash station is readily available” |  |  |
| An safety shower station is readily available |  |  |
| Biological spill kit procedure is available in the lab |  |  |
| Chemical spill kit procedure is available in the lab |  |  |
| The exit pathway is free from obstruction |  |  |
| The fire emergency procedure is displayed clearly |  |  |
| The emergency exit door is working properly |  |  |
| The fire extinguisher is accessible |  |  |
| The fire extinguisher is inspected monthly |  |  |
| The fire alarm equipment is working |  |  |
| The fire alarm equipment is inspected |  |  |
| The fire suppression system is provided and inspected |  |  |
| All the electronic wiring/ sockets/ extension cords/ adaptors is safe & not overloaded. |  |  |
| The operating instructions for machines and equipment’s e.g. Autoclave are available and displayed in the lab |  |  |
| The lab lights are adequate |  |  |
| The lab lights are working properly |  |  |
| The chemical inventory is available |  |  |
| Material safety data sheet (MSDS) is available and accessible |  |  |
| Material safety data sheet (MSDS) is updated |  |  |
| Laboratory has adequate supervision ( 1supervisor : 15 students) |  |  |
| Chemical spill kit is quarterly inspected |  |  |

**References:**

1. *Biosafety Level 2 Checklist(n.d.),* <http://webfiles.ehs.ufl.edu/bsl2checklist.pdf>
2. *CDC Import Permit Inspection Checklist for BSL-2 Laboratories (BMBL 5th Edition)(n.d.),* <https://www.cdc.gov/cpr/ipp/inspection/docs/Import_Permit_Checklist_BSL-2.pdf>
